# Supplementary material for: Benzimidazole-1,2,3-triazole hybrid molecules: synthesis and study of their interaction with G-quadruplex DNA
Source: Royal Society of Chemistry journal article supplement (doi:10.1039/d0md00414f), 2021-01-01
Supplement: d0md00414f1.zip [file supporting information md-res-12-2020-000414.doc]

**Supporting Information**

**Benzimidazole-1,2,3-triazole Hybrid Molecules: Synthesis and Study of their Interaction with G-quadruplex DNA**

Padma S. Singu,a,f Ushasri Chilakamarthi,*b Namita S. Mahadik,c Bhamidipati Keerti,c Narasimhulu Valipenta,a,f Santosh N. Mokale,d Narayana Nagesh,*e Ravindra M. Kumbhare*a,f

*a Department of Fluoro-Agrochemicals, CSIR-Indian Institute of Chemical Technology, Tarnaka, Hyderabad 500007, India.*

*bPolymers and functional materials Division, CSIR–Indian Institute of Chemical Technology, Hyderabad-500007, India.*

*cApplied Biology Division, CSIR–Indian Institute of Chemical Technology, Hyderabad-500007, India.*

*dY. B. Chavan College of Pharmacy, Dr. Rafiq Zakaria Campus, Aurangabad-431001, India.*

*eCSIR-Centre for Cellular and Molecular Biology, Medical Biotechnology Complex, ANNEXE II, Uppal Road, Hyderabad 500007, India.*

*fAcademy of Scientific and Innovative Research (AcSIR), Ghaziabad, India.*

**Table of Contents**

| **Sr. No.** | **Contents** | **Page No.** |
| --- | --- | --- |
|  | General Information and Procedure | S2 |
|  | Copies of the NMR and HRMS data for all the compounds | S3-S23 |
|  | HPLC chromatogram of 5-(difluoromethoxy)-2-(((1-(4-nitrophenyl)-1*H*-1,2,3-triazol-4-yl)methyl)thio)-1*H*-benzo[*d*]imidazole **(4c)** | S24 |
|  | HPLC chromatogram of N-cyclohexyl-2-(4-(((5-(difluoromethoxy)-1*H*-benzo[*d*]imidazol-2-yl)thio)methyl)-1*H*-1,2,3-triazol-1-yl)acetamide **(4f)** | S25 |
| 5. | UV-visible melting curves of (25 μM) Tel Q, c-Myc, dsDNA and their complexes with 10.3 µM of **4c** and 8.5 µM of **4f** | S26 |

**General Information**

All solvents were distilled before use. Dry reactions were conducted under nitrogen atmosphere. All chemicals and reagents required for the synthesis were obtained from Sigma-Aldrich (St. Louis, MO). Crude products were purified by column chromatography on silica gel (180–200 mesh). All the reactions were monitored by thin layer chromatography (TLC) on pre-coated silica gel 60 F254 (mesh), spots were visualized with UV light. Melting points were recorded on Casia-Siamia (VMP-AM) melting point apparatus and are uncorrected. IR spectra were recorded on a Perkin-Elmer FT-IR 240-C spectrophotometer using KBr optics. 1H NMR spectra were recorded on Bruker AV 300 MHz and AV 400MHz in CDCl3 and DMSO-*d6* using TMS as internal standard. Chemical shifts (*δ*) are reported in parts per million (ppm) relative to tetramethylsilane, which was used as an internal standard. Coupling constants (*J*) are quoted in Hertz (Hz). Electron impact (EI) and chemical ionization mass spectra were recorded on a VG 7070 H instrument at 70 eV.

**General Procedure**

Here, we synthesized benzimidazole 1,2,3-triazole derivatives **4a-4f** as follows; a) propargylation of 5-(difluoromethoxy)-1*H*-benzo[*d*]imidazole-2-thiol **1** with propargyl bromide using K2CO3 as a base to give terminal alkyne **2**; b) 1,3-dipolar cycloaddition of compound **2** with different azides **3a-3f** in anhydrous tetrahydrofuran using CuI (5 mol%) as a catalyst at ambient temperature for 24 h afforded the corresponding triazole derivatives **4a-4f** in good to excellent yields (65-95%). All the products were characterized by IR spectroscopy, 1H and 13C NMR spectroscopy and mass spectrometry.

**Figure S1.** 1H NMR (CDCl3 + DMSO-*d6*) spectrum of 5-(difluoromethoxy)-2-(prop-2-yn-1-ylthio)-1*H*-benzo[*d*]imidazole **(2)**

**Figure S2.** 13C NMR (CDCl3 + DMSO-*d*6) spectrum of 5-(difluoromethoxy)-2-(prop-2-yn-1-ylthio)-1*H*-benzo[*d*]imidazole **(2)**

**Figure S3.** HRMS of 5-(difluoromethoxy)-2-(prop-2-yn-1-ylthio)-1*H*-benzo[*d*]imidazole **(2)**

**Figure S4.** 1H NMR (CDCl3) spectrum of 5-(difluoromethoxy)-2-(((1-(3,4-difluorophenyl)-1*H*-1,2,3-triazol-4-yl)methyl)thio)-1*H*-benzo[*d*]imidazole **(4a)**

**Figure S5.** 13C NMR (CDCl3) spectrum of 5-(difluoromethoxy)-2-(((1-(3,4-difluorophenyl)-1*H*-1,2,3-triazol-4-yl)methyl)thio)-1*H*-benzo[*d*]imidazole **(4a)**

**Figure S6.** HRMS of 5-(difluoromethoxy)-2-(((1-(3,4-difluorophenyl)-1*H*-1,2,3-triazol-4-yl)methyl)thio)-1*H*-benzo[*d*]imidazole **(4a)**

**Figure S7.** 1HNMR (CDCl3) spectrum of 2-(((1-(2,3-dichlorophenyl)-1*H*-1,2,3-triazol-4-yl)methyl)thio)-5-(difluoromethoxy)-1*H*-benzo[*d*]imidazole **(4b)**

**Figure S8.** 13C NMR (CDCl3 + DMSO-*d6*)spectrum of 2-(((1-(2,3-dichlorophenyl)-1*H*-1,2,3-triazol-4-yl)methyl)thio)-5-(difluoromethoxy)-1*H*-benzo[*d*]imidazole **(4b)**

**FigureS9.** HRMS of 2-(((1-(2,3-dichlorophenyl)-1*H*-1,2,3-triazol-4-yl)methyl)thio)-5-(difluoromethoxy)-1*H*-benzo[*d*]imidazole **(4b)**

**Figure S10.** 1H NMR (CDCl3) spectrum of 5-(difluoromethoxy)-2-(((1-(4-nitrophenyl)-1*H*-1,2,3-triazol-4-yl)methyl)thio)-1*H*-benzo[*d*]imidazole **(4c)**

**Figure S11.** 13C NMR (CDCl3+DMSO-*d6*) spectrum of 5-(difluoromethoxy)-2-(((1-(4-nitrophenyl)-1*H*-1,2,3-triazol-4-yl)methyl)thio)-1*H*-benzo[*d*]imidazole **(4c)**

**Figure S12.** HRMS of 5-(difluoromethoxy)-2-(((1-(4-nitrophenyl)-1*H*-1,2,3-triazol-4-yl)methyl)thio)-1*H*-benzo[*d*]imidazole **(4c)**

**Figure S13.** 1H NMR (DMSO-*d*6) spectrum of *N*-(3-chlorophenyl)-2-(4-(((5-(difluoromethoxy)-1*H*-benzo[*d*]imidazol-2-yl)thio)methyl)-1*H*-1,2,3-triazol-1-yl)acetamide **(4d)**

**Figure S14.** 13C NMR (DMSO-*d6*) spectrum of *N*-(3-chlorophenyl)-2-(4-(((5-(difluoromethoxy)-1*H*-benzo[*d*]imidazol-2-yl)thio)methyl)-1*H*-1,2,3-triazol-1-yl)acetamide **(4d)**

**Figure S15.** HRMS of *N*-(3-chlorophenyl)-2-(4-(((5-(difluoromethoxy)-1*H*-benzo[*d*]imidazol-2-yl)thio)methyl)-1*H*-1,2,3-triazol-1-yl)acetamide **(4d)**

**Figure S16.** 1H NMR (DMSO-*d6*) spectrum of 2-(4-(((5-(difluoromethoxy)-1*H*-benzo[*d*]imidazol-2-yl)thio)methyl)-1*H*-1,2,3-triazol-1-yl)-N-(2-methyl-3-nitrophenyl)acetamide (**4e)**

**Figure S17.** 13C NMR (DMSO-*d6*) spectrum of 2-(4-(((5-(difluoromethoxy)-1*H*-benzo[*d*]imidazol-2-yl)thio)methyl)-1*H*-1,2,3-triazol-1-yl)-*N*-(2-methyl-3-nitrophenyl)acetamide **(4e)**

**Figure S18.** HRMS of 2-(4-(((5-(difluoromethoxy)-1*H*-benzo[*d*]imidazol-2-yl)thio)methyl)-1*H*-1,2,3-triazol-1-yl)-*N*-(2-methyl-3-nitrophenyl)acetamide **(4e)**

**Figure S19.** 1H NMR (DMSO-*d6*) spectrum *N*-cyclohexyl-2-(4-(((5-(difluoromethoxy)-1*H*-benzo[*d*]imidazol-2-yl)thio)methyl)-1*H*-1,2,3-triazol-1-yl)acetamide **(4f)**

**Figure S20.** 13C NMR (DMSO-*d6*) spectrum of *N*-cyclohexyl-2-(4-(((5-(difluoromethoxy)-1*H*-benzo[*d*]imidazol-2-yl)thio)methyl)-1*H*-1,2,3-triazol-1-yl)acetamide **(4f)**

**Figure S21.** HRMS of *N-*cyclohexyl-2-(4-(((5-(difluoromethoxy)-1*H*-benzo[*d*]imidazol-2-yl)thio)methyl)-1*H*-1,2,3-triazol-1-yl)acetamide (**4f)**

**Figure S22.** HPLC chromatogram of 5-(difluoromethoxy)-2-(((1-(4-nitrophenyl)-1*H*-1,2,3-triazol-4-yl)methyl)thio)-1*H*-benzo[*d*]imidazole **(4c)**

**Figure S23.** HPLC chromatogram of *N*-cyclohexyl-2-(4-(((5-(difluoromethoxy)-1*H*-benzo[*d*]imidazol-2-yl)thio)methyl)-1*H*-1,2,3-triazol-1-yl)acetamide **(4f)**

**Figure S24.** UV-visible melting curves of (25 μM) Tel Q, c-Myc, dsDNA and their complexes with10.3 µM of **4c** and 8.5 µM of **4f** at 25 ℃.
